# Supplementary material
Source: publisher figshare collection journal article supplement (https://acs.figshare.com/ndownloader/files/9703252)
Supplement: Supplementary file 1 [file 9703252]

Supporting Information For

# Mid-Wave Infrared Photoconductors Based on Black Phosphorous-Arsenic Alloys

*Matin Amani<sup>1,2</sup>, Emma Regan<sup>1,2</sup>, James Bullock<sup>1,2</sup>, Geun Ho Ahn<sup>1,2</sup>, and Ali Javey<sup>1,2,\*</sup>*

<sup>1</sup>Electrical Engineering and Computer Sciences, University of California at Berkeley, Berkeley, CA 94720, United States

<sup>2</sup>Materials Sciences Division, Lawrence Berkeley National Laboratory, Berkeley, CA 94720, United States

\*Address correspondence to [ajavey@eecs.berkeley.edu](mailto:ajavey@eecs.berkeley.edu)

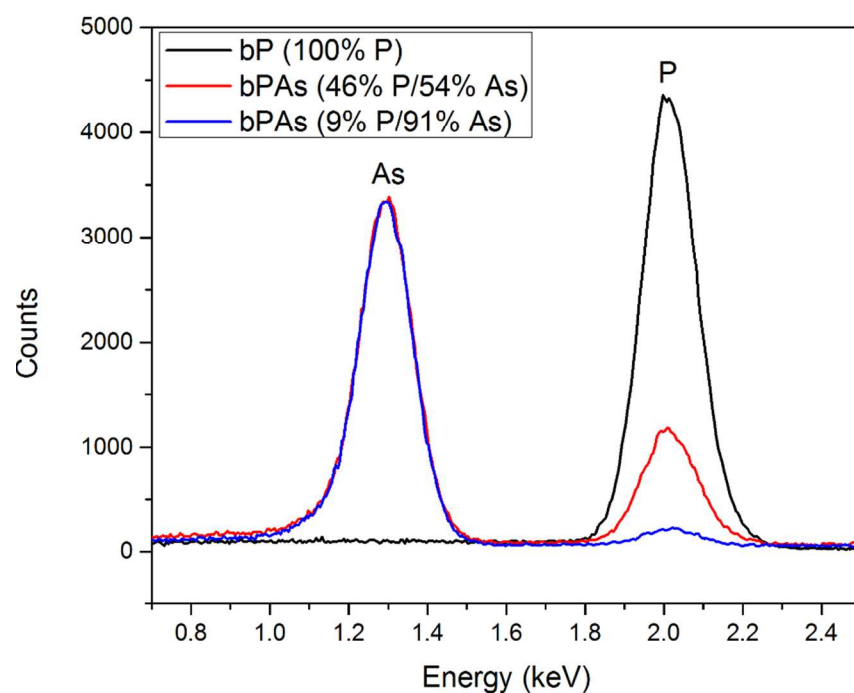

**Figure S1.** EDX Spectra, showing As  $L\alpha$  (1.282 keV) and P  $K\alpha$  (2.013 keV) peaks, measured for the various compositions of b-P and b-PAs studied here.

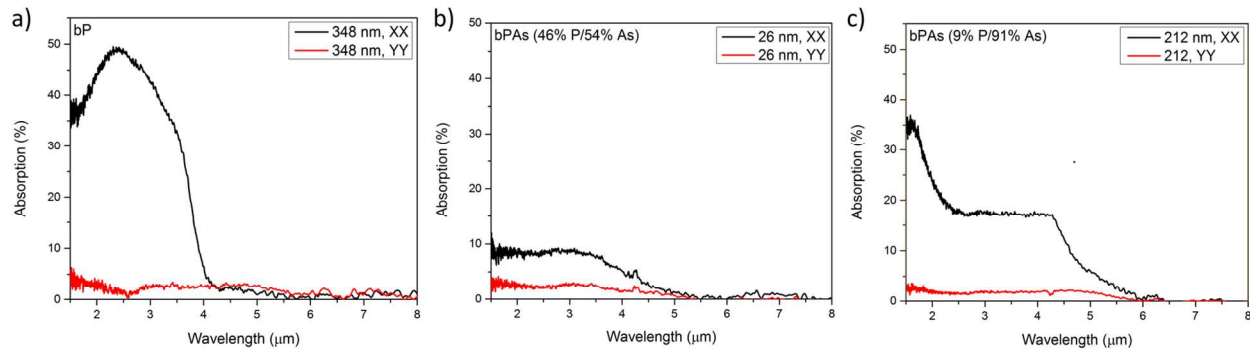

**Figure S2.** (a) Absorption spectra, calculated from 100-T-R in the X and Y directions measured on 348 nm thick b-P. (b) Absorption spectra, calculated from 100-T-R in the X and Y directions measured on 26 nm thick b-PAs (83% As). (c) Absorption spectra, calculated from 100-T-R in the X and Y directions measured on 212 nm thick b-PAs (91% As). Note that the total absorption is a strong function b-P/b-PAs thickness and refractive index.

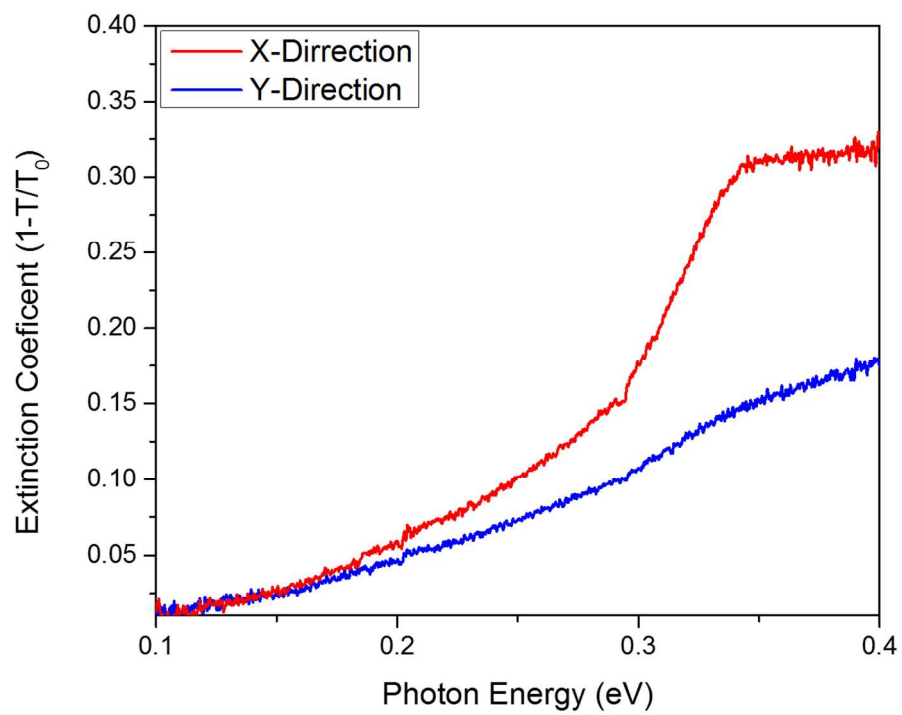

**Figure S3.** Extinction coefficient measured for a b-P crystal on a KBr substrate from transmission.

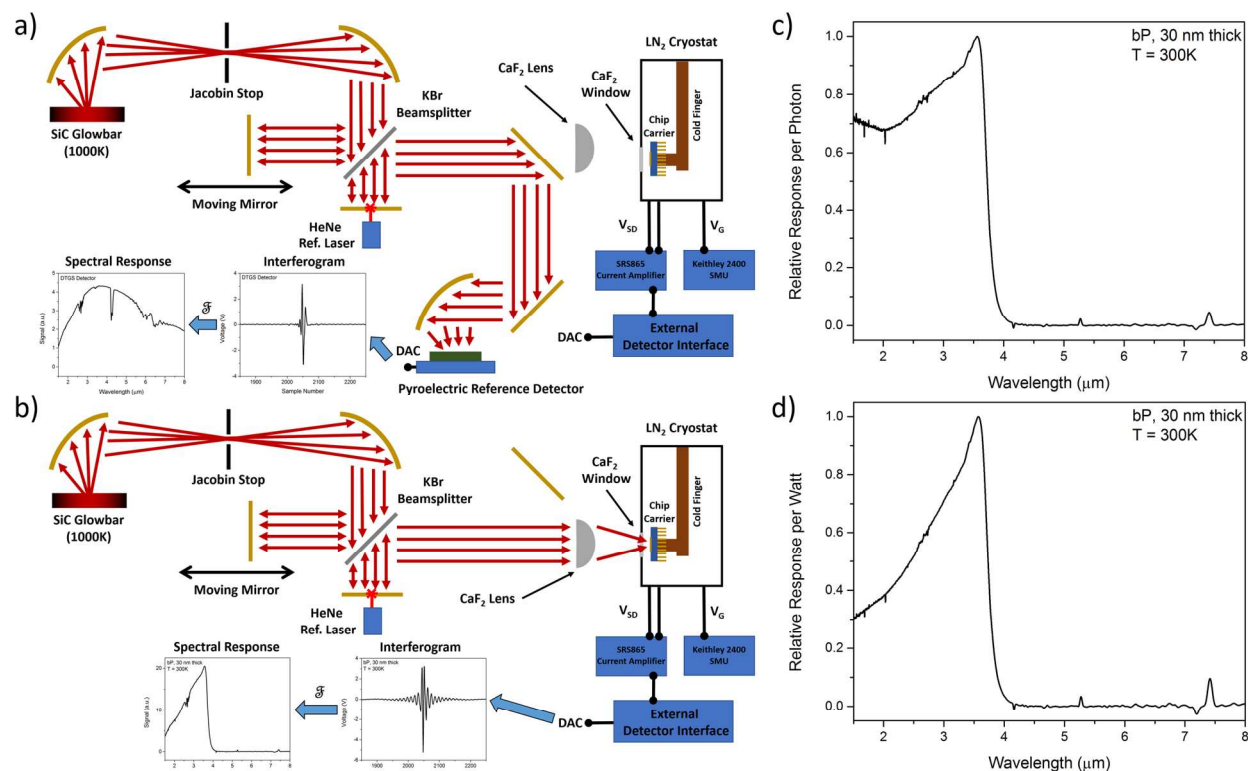

**Figure S4.** (a) Schematic of measurement setup used to measure the spectral content of the incident light on the b-P detector, measurements taken using the internal pyroelectric detector of the FTIR were performed at an optical velocity of 0.15 cm/s. (b) Schematic of measurement setup used to measure the spectral response of the b-P and b-PAs gated photoconductors. Light from the FTIR Glowbar was focused on the device using either a CaF<sub>2</sub> lens or a Schwarzschild objective. During measurements, the gate voltage was modulated from  $V_g$  during the interferometer scan to  $-V_g$  during the wait period, in order to minimize hysteresis effects (timing shown in Fig. S3). (c) Relative response per photon of a b-P gated photoconductor, calculated using the ratio of response from the b-P detector to the pyroelectric reference detector. (d) Relative response per photon of a b-P gated photoconductor, calculated using the ratio of response from the b-P detector to the pyroelectric reference detector and photon energy.

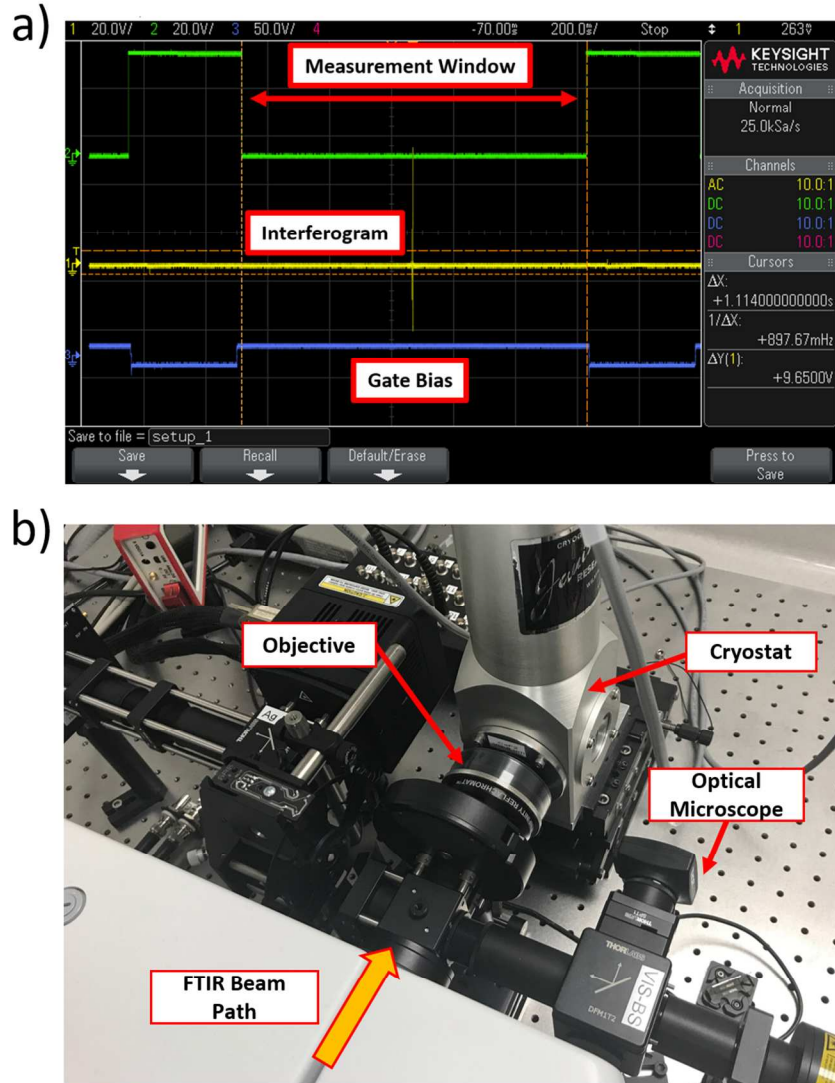

**Figure S5.** (a) Timing of gate biasing during FTIR measurements. During the measurement window, which is identified by an external trigger from the FTIR, the gate is held at the desired bias potential,  $V_g$ . During the rest period, the gate bias is held at  $-V_g$ , in order to minimize hysteresis effects. (b) Photograph of the optical setup used to measure the spectral and frequency response of the b-P and b-PAs gated photoconductors. Sample is placed in a 24-pin chip carrier in the cryostat. An external microscope is setup to locate and focus light on the sample with a reflective objective or  $\text{CaF}_2$  lens.

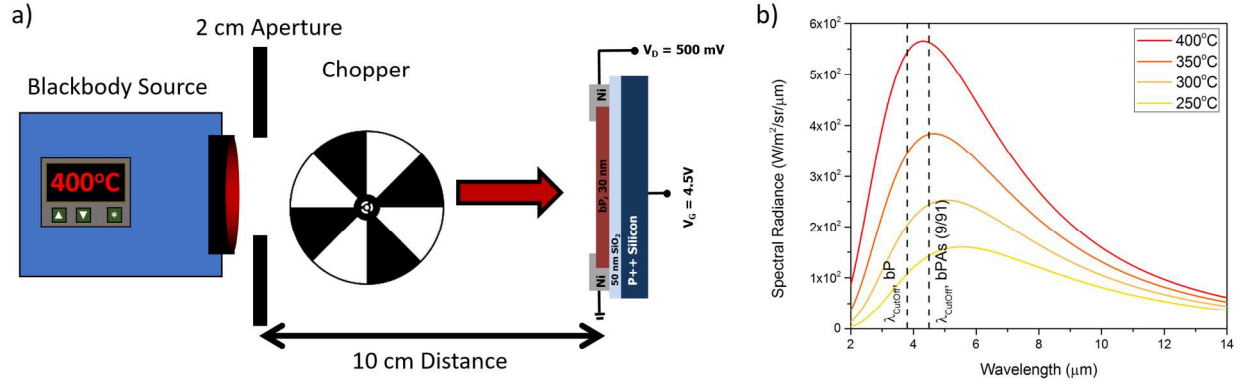

**Figure S6.** (a) Schematic of the setup used to measure the absolute responsivity and detectivity of the b-P detector. The sample was illuminated by a blackbody source held at 400°C-250°C (673 K-523 K). The beam was modulated using a chopper and the response of the gated photoconductor was measured using a lock-in amplifier. (b) Spectrum of the illumination on the sample at various blackbody temperatures calculated using Plank's law. The cut-off wavelengths for b-P and b-PAs (91% As) are indicated by dashed lines.
